# Supplementary material for: Origin of the enantioselectivity of alcohol dehydrogenase
Source: Royal Society of Chemistry journal article supplement (doi:10.1039/d3cp04019d), 2023-01-01
Supplement: d3cp04019d5.pdf [file d3cp04019d5.pdf]

## Support Information

### Origin of the Enantioselectivity of Alcohol Dehydrogenase

Jiahui Zhou<sup>1#</sup>, Tao Han<sup>2#</sup>, Shahbaz Ahmad<sup>1,3</sup>, Derek Quinn<sup>3</sup>, Thomas Moody<sup>3,4</sup>, Qi Wu<sup>2\*</sup>,  
Meilan Huang<sup>1\*</sup>

<sup>1</sup> School of Chemistry and Chemical Engineering, Queen's University, David Keir Building,  
Stranmillis Road, Belfast BT9 5AG, Northern Ireland, UK;

<sup>2</sup> Department of Chemistry, Zhejiang University, Hangzhou, 310027, P. R. China;

<sup>3</sup> Almac Sciences, Department of Biocatalysis and Isotope Chemistry, Almac House, 20  
Seagoe Industrial Estate, Craigavon BT63 5QD, Northern Ireland, United Kingdom;

<sup>4</sup> Arran Chemical Company Limited, Unit 1 Monksland Industrial Estate, Athlone,  
Co. Roscommon, Ireland

# Equal contributions



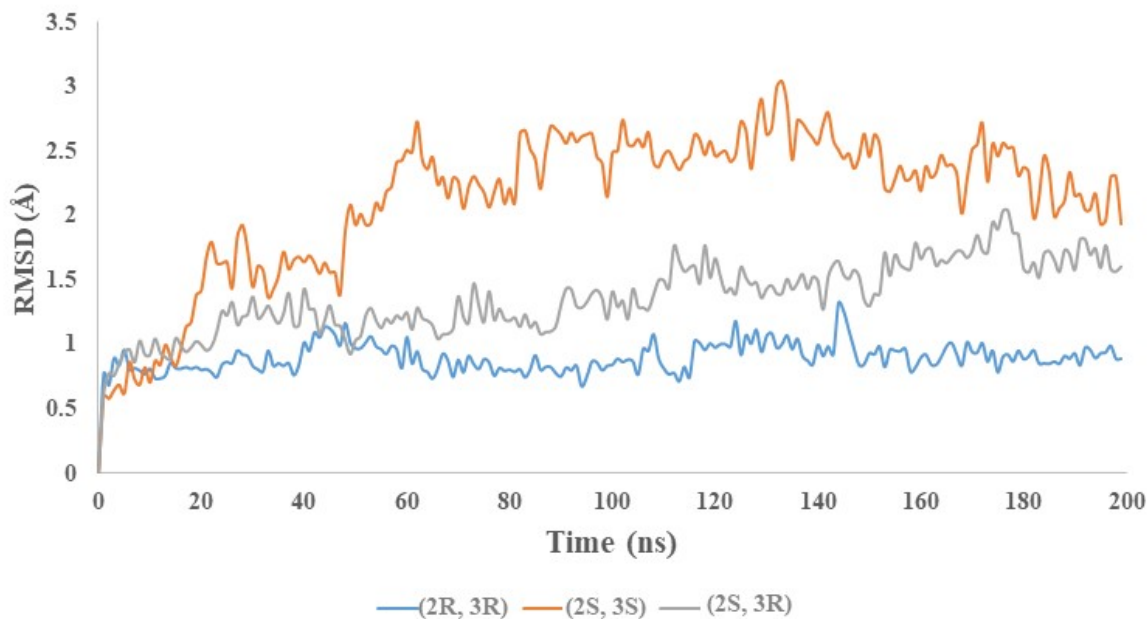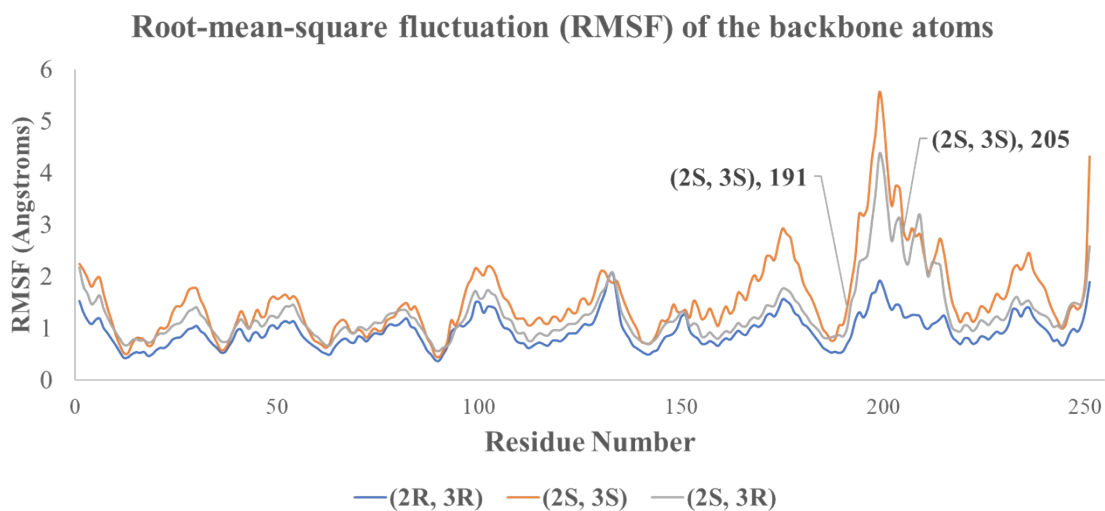

**Figure S2.** (A) RMSD plot of *LbADH* in complex with the substrate poses that lead to the major product (2*R*, 3*R*) (in blue), the minor product (2*S*,3*S*) (in orange) and the inaccessible product (2*S*, 3*R*) (in grey). (B) RMSF plot of the protein backbone atoms of the enzyme in complex with the substrate poses that lead to the major product (2*R*, 3*R*) (in blue), the minor product (2*S*,3*S*) (in orange) and the inaccessible product (2*S*, 3*R*) (in grey).

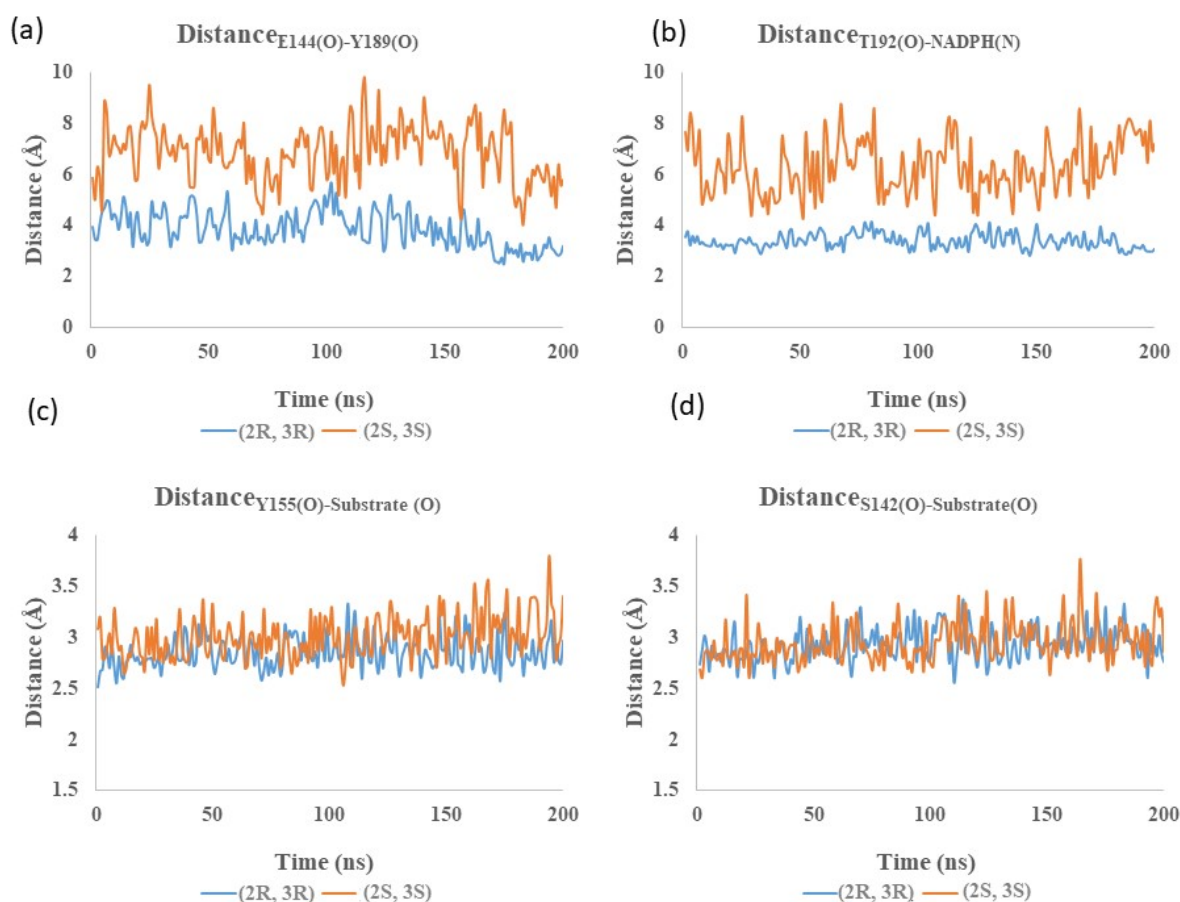

**Figure S3.** The distances between the substrate and the ADH enzyme from MD simulations. (A) Distance between Glu144 and Tyr189 indicates the presence of hydrogen bond in the major product (*2R*, *3R*) and the absence of the hydrogen bond in the minor product (*2S*,*3S*); (B) Distance between Thr192 oxygen and NADPH nitrogen indicates the presence of hydrogen bond in the major product (*2R*, *3R*) and the absence of the hydrogen bond in the minor product (*2S*,*3S*); (C) Distance between Tyr155 and the substrate carbonyl oxygen indicates the formation of stable hydrogen bonds; (D) Distance between Ser142 and the substrate carbonyl oxygen indicates the formation of stable hydrogen bonds.

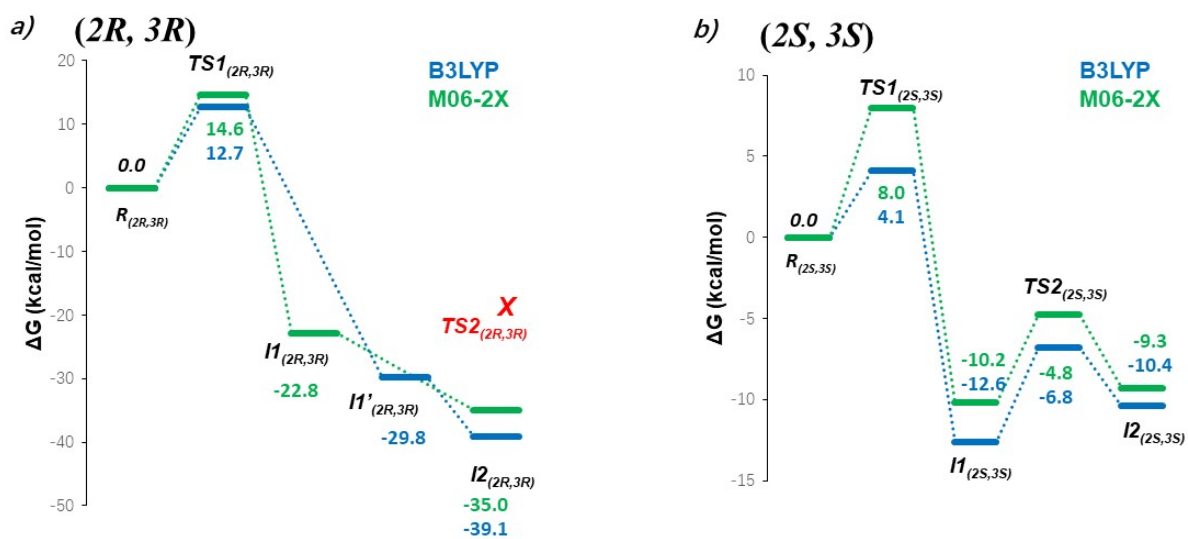

**Figure S4.** Free energy profile for (A) the major product (2*R*, 3*R*) and (B) the minor product (2*S*,3*S*). Geometries were optimized at B3LYP and M06-2X with the 6-31G\* basis set.

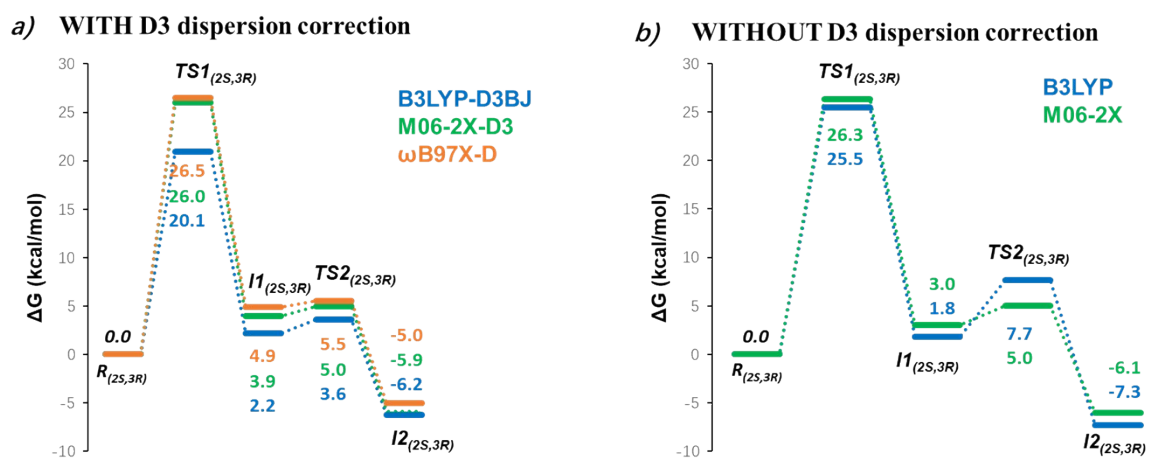

**Figure S5.** Free Energy Profile of the inaccessible product ( $2S,3R$ ). (A) Geometries were optimized at B3LYP-D3(BJ), M06-2X-D3 and  $\omega$ B97X-D with the 6-31G\* basis set. (B) Geometries were optimized at B3LYP and M06-2X with the 6-31G\* basis set.

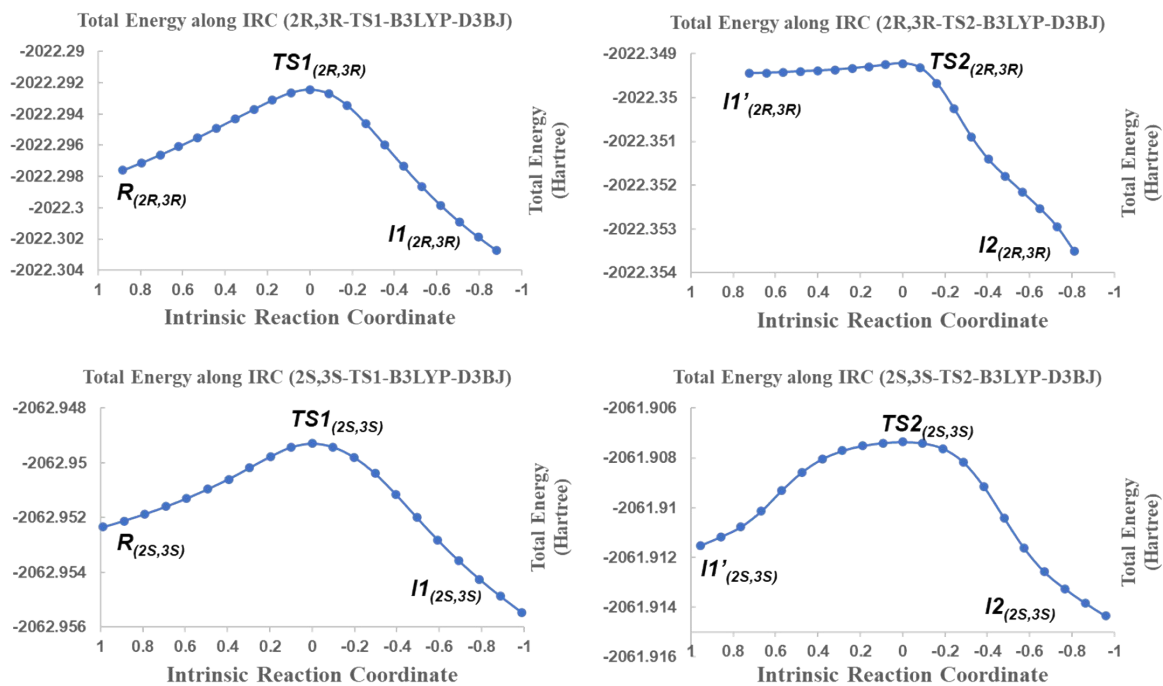

**Figure S6.** IRC analysis for the two transition states TS1 and TS2 in the major product (2R, 3R) and the minor product (2S,3S).

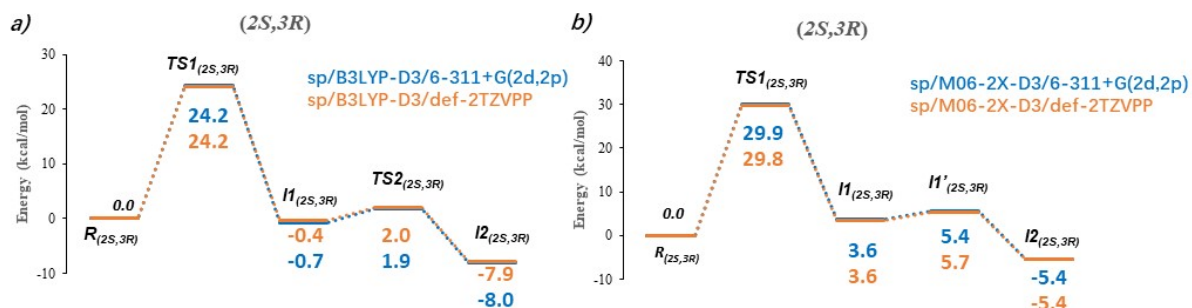

**Figure S7.** Free energy profile for the enzyme-substrate complexes with the substrate poses leading to the inaccessible product (2S, 3R). Single point energy corrections were conducted with large basis sets 6-311+G(2d,2p) and def-2TZVPP based on the optimized geometries obtained at (A) B3LYP-D3(BJ)/6-31G\* and (B) M06-2X-D3/6-31G\*.



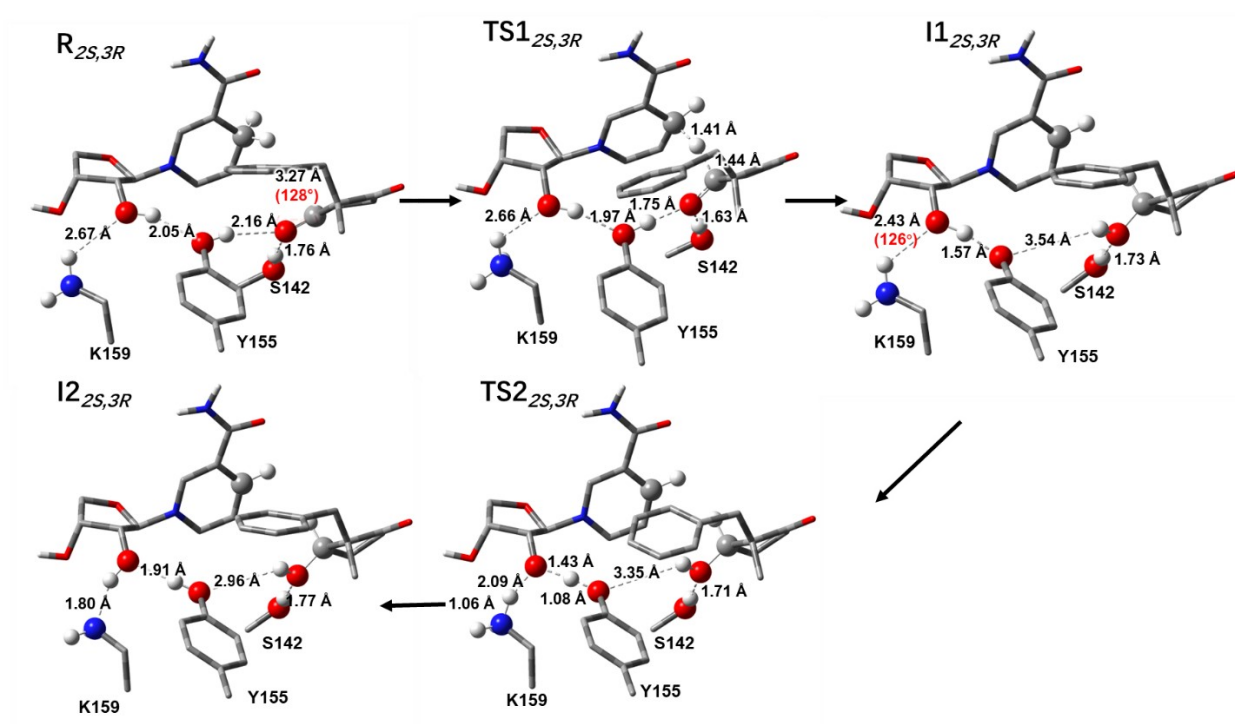

**Figure S8.** Optimized structures of the inaccessible product ( $2S,3R$ ). Geometries were optimized at B3LYP-D3(BJ) functional level with the 6-31G\* basis set.

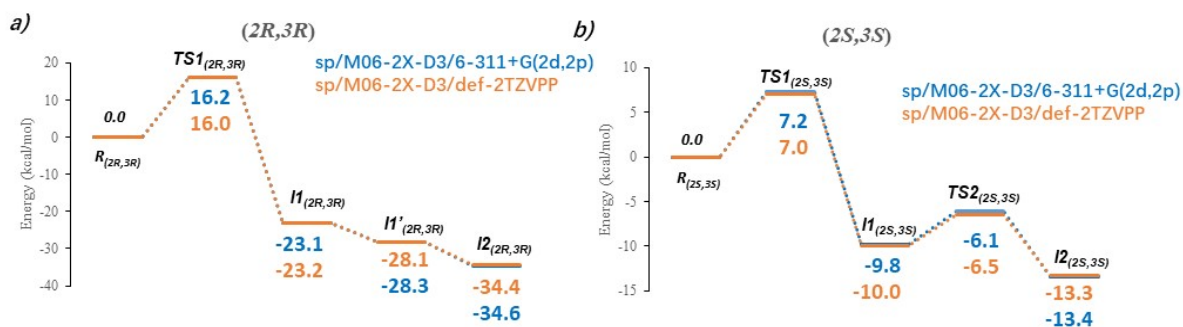

**Figure S9.** Free energy profile for the enzyme-substrate complexes with the substrate poses leading to (A) (2R, 3R) or (B) (2S, 3S) product. Single point energy corrections were conducted with large basis sets 6-311+G(2d,2p) and def-2TZVPP based on the optimized geometries obtained at M06-2X-D3/6-31G\*.
