# Supplementary material for: Origin of the enantioselectivity of alcohol dehydrogenase
Source: Royal Society of Chemistry journal article supplement (doi:10.1039/d3cp04019d), 2023-01-01
Supplement: d3cp04019d6.pdf [file d3cp04019d6.pdf]

**Table S1:** Cluster analysis of MD simulations of enzyme-structure complexes

| Cluster | <i>(2R,3R)</i> |                             |                          | <i>(2S,3S)</i> |                             |                          | <i>(2S,3R)</i> |                             |                          |
|---------|----------------|-----------------------------|--------------------------|----------------|-----------------------------|--------------------------|----------------|-----------------------------|--------------------------|
|         | Frames         | RMSD <sub>initial</sub> (Å) | RMSD <sub>Mini</sub> (Å) | Frames         | RMSD <sub>initial</sub> (Å) | RMSD <sub>Mini</sub> (Å) | Frames         | RMSD <sub>initial</sub> (Å) | RMSD <sub>Mini</sub> (Å) |
| 0       | 429(65%)       | 0.948                       | 0.0588                   | 460(71%)       | 0.967                       | 0.0619                   | 226(34%)       | 1.245                       | 0.0636                   |
| 1       | 195(30%)       | 1.057                       | 0.0558                   | 103(16%)       | 1.097                       | 0.0613                   | 201(30%)       | 1.21                        | 0.0608                   |
| 2       | 13(2%)         | 1.23                        | 0.0609                   | 85(13%)        | 1.202                       | 0.0581                   | 165(25%)       | 1.216                       | 0.0627                   |
| 3       | 12(2%)         | 1.29                        | 0.0596                   | 10(2%)         | 1.294                       | 0.0567                   | 53(8%)         | 1.298                       | 0.0607                   |
| 4       | 11(2%)         | 1.239                       | 0.0595                   | 2(1%)          | 1.301                       | 0.0586                   | 15(2%)         | 1.532                       | 0.0625                   |

RMSD analysis was performed on all atoms for each structure;

RMSD<sub>initial</sub>: The deviation of cluster coordinates to the initial structure coordinates;

RMSD<sub>Mini</sub>: The deviation of minimized structure coordinates (used for QM/MM scan) to their respective cluster coordinates
